# Supplementary material for: Development and Validation of CXCR4 Nomogram-Based Immune Infiltration/Tumor Inflammation in Primary Glioblastoma
Source: MDPI journal article supplement (doi:10.3390/brainsci13081152), 2023-08-01
Supplement: s1 [file s1]

**Figure S1. The protein-protein interaction network (PPI).**

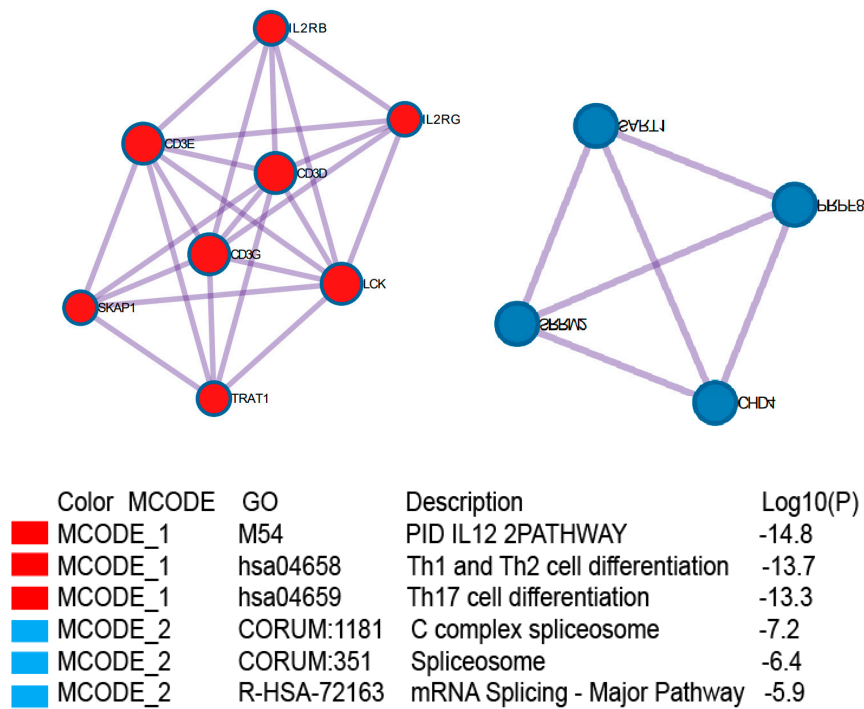

**Table S1. Statistics reporting.**

| Gene symbol   | Gene ID           | PCC  |
|---------------|-------------------|------|
| CXCR2         | ENSG00000180871.7 | 0.98 |
| S100A12       | ENSG00000163221.8 | 0.96 |
| FFAR2         | ENSG00000126262.4 | 0.93 |
| RP4-568C11.4  | ENSG00000274173.1 | 0.91 |
| RN7SL653P     | ENSG00000239794.3 | 0.9  |
| U3            | ENSG00000281710.1 | 0.9  |
| RP11-666A8.11 | ENSG00000267084.1 | 0.9  |
| LINC01360     | ENSG00000233973.5 | 0.9  |
| SNX19P1       | ENSG00000228184.1 | 0.9  |
| RPS4XP12      | ENSG00000244400.2 | 0.9  |
| OR4A7P        | ENSG00000255349.1 | 0.9  |
| RP4-591B8.3   | ENSG00000271419.1 | 0.9  |
| PRSS3P3       | ENSG00000277083.1 | 0.9  |
| RP11-325O24.6 | ENSG00000281248.1 | 0.9  |
| CT83          | ENSG00000204019.4 | 0.9  |
| OR2T3         | ENSG00000196539.3 | 0.9  |
| PRPF19P1      | ENSG00000264685.1 | 0.9  |
| RP11-353N14.3 | ENSG00000262343.1 | 0.9  |

|               |                    |      |
|---------------|--------------------|------|
| AC093698.4    | ENSG00000224529.1  | 0.9  |
| AC055736.3    | ENSG00000281194.1  | 0.9  |
| CXCR1         | ENSG00000163464.7  | 0.98 |
| S100A12       | ENSG00000163221.8  | 0.93 |
| RP4-568C11.4  | ENSG00000274173.1  | 0.93 |
| FFAR2         | ENSG00000126262.4  | 0.93 |
| PRSS3P3       | ENSG00000277083.1  | 0.92 |
| RP11-325O24.6 | ENSG00000281248.1  | 0.92 |
| RN7SL653P     | ENSG00000239794.3  | 0.92 |
| RP11-666A8.11 | ENSG00000267084.1  | 0.92 |
| U3            | ENSG00000281710.1  | 0.92 |
| RP11-305F5.2  | ENSG00000243016.1  | 0.92 |
| CT83          | ENSG00000204019.4  | 0.92 |
| LINC01360     | ENSG00000233973.5  | 0.92 |
| AC093698.4    | ENSG00000224529.1  | 0.92 |
| AC055736.3    | ENSG00000281194.1  | 0.92 |
| SNX19P1       | ENSG00000228184.1  | 0.92 |
| OR8J1         | ENSG00000172487.3  | 0.92 |
| RP11-799D4.2  | ENSG00000266981.1  | 0.92 |
| RPS4XP12      | ENSG00000244400.2  | 0.92 |
| OR4A7P        | ENSG00000255349.1  | 0.92 |
| RP4-591B8.3   | ENSG00000271419.1  | 0.92 |
| CD3E          | ENSG00000198851.9  | 0.94 |
| IKZF3         | ENSG00000161405.16 | 0.94 |
| LCK           | ENSG00000182866.16 | 0.93 |
| CD2           | ENSG00000116824.4  | 0.93 |
| SIRPG         | ENSG00000089012.14 | 0.92 |
| TRBV25-1      | ENSG00000211751.7  | 0.92 |
| CD27          | ENSG00000139193.3  | 0.91 |
| ICOS          | ENSG00000163600.12 | 0.91 |
| PTPRCAP       | ENSG00000213402.2  | 0.89 |
| IL2RG         | ENSG00000147168.12 | 0.89 |
| PYHIN1        | ENSG00000163564.14 | 0.89 |
| IL2RB         | ENSG00000100385.13 | 0.88 |
| SLA2          | ENSG00000101082.13 | 0.88 |
| P2RY10        | ENSG00000078589.12 | 0.88 |
| GZMK          | ENSG00000113088.5  | 0.87 |
| SIT1          | ENSG00000137078.8  | 0.87 |
| CD6           | ENSG00000013725.14 | 0.87 |
| SH2D1A        | ENSG00000183918.14 | 0.86 |
| SLAMF7        | ENSG00000026751.16 | 0.86 |
| TRAT1         | ENSG00000163519.13 | 0.85 |
| FGF5          | ENSG00000138675.16 | 0.6  |

|                |                    |      |
|----------------|--------------------|------|
| PIK3C3         | ENSG00000078142.11 | 0.58 |
| RP1-244F24.1   | ENSG00000271857.1  | 0.57 |
| RP11-264B14.1  | ENSG00000267207.1  | 0.57 |
| GPR39          | ENSG00000183840.6  | 0.57 |
| RP11-205M5.3   | ENSG00000280064.1  | 0.57 |
| KLF5           | ENSG00000102554.13 | 0.56 |
| NKX2-6         | ENSG00000180053.7  | 0.56 |
| RP11-59D5__B.2 | ENSG00000236345.1  | 0.56 |
| HGF            | ENSG00000019991.15 | 0.55 |
| C9orf92        | ENSG00000205549.8  | 0.54 |
| CYP2S1         | ENSG00000167600.13 | 0.54 |
| RNF144B        | ENSG00000137393.9  | 0.54 |
| NDFIP1P1       | ENSG00000255892.1  | 0.53 |
| SULT1C2        | ENSG00000198203.9  | 0.53 |
| RN7SKP154      | ENSG00000222068.1  | 0.53 |
| RP11-384F7.1   | ENSG00000243276.5  | 0.53 |
| RP11-316I3.1   | ENSG00000237283.1  | 0.53 |
| MKX-AS1        | ENSG00000230500.1  | 0.53 |
| H2BFS          | ENSG00000234289.5  | 0.53 |
| CEP131         | ENSG00000141577.13 | 0.69 |
| PRRC2A         | ENSG00000204469.12 | 0.68 |
| SRRM2          | ENSG00000167978.16 | 0.66 |
| INTS1          | ENSG00000164880.15 | 0.66 |
| SART1          | ENSG00000175467.14 | 0.66 |
| GAK            | ENSG00000178950.16 | 0.66 |
| USP20          | ENSG00000136878.12 | 0.65 |
| HGS            | ENSG00000185359.12 | 0.65 |
| ZBTB17         | ENSG00000116809.11 | 0.65 |
| ATXN2L         | ENSG00000168488.18 | 0.65 |
| CHD4           | ENSG00000111642.14 | 0.65 |
| TRAPPC12       | ENSG00000171853.15 | 0.64 |
| PRPF8          | ENSG00000174231.16 | 0.64 |
| RP11-2C24.3    | ENSG00000280211.1  | 0.64 |
| RP11-488C13.5  | ENSG00000258301.3  | 0.64 |
| GTF3C1         | ENSG00000077235.17 | 0.64 |
| MED24          | ENSG00000008838.17 | 0.64 |
| IGHMBP2        | ENSG00000132740.8  | 0.63 |
| SPTAN1         | ENSG00000197694.13 | 0.63 |
| DROSHA         | ENSG00000113360.16 | 0.63 |
| CD3D           | ENSG00000167286.9  | 0.93 |
| CD2            | ENSG00000116824.4  | 0.9  |
| PTPRCAP        | ENSG00000213402.2  | 0.87 |
| LCK            | ENSG00000182866.16 | 0.86 |

|          |                    |      |
|----------|--------------------|------|
| TRBV25-1 | ENSG00000211751.7  | 0.86 |
| SIT1     | ENSG00000137078.8  | 0.85 |
| CD3E     | ENSG00000198851.9  | 0.85 |
| CD27     | ENSG00000139193.3  | 0.84 |
| GZMA     | ENSG00000145649.7  | 0.83 |
| GZMH     | ENSG00000100450.12 | 0.83 |
| CCL5     | ENSG00000271503.5  | 0.83 |
| ICOS     | ENSG00000163600.12 | 0.82 |
| SKAP1    | ENSG00000141293.15 | 0.81 |
| TRBV19   | ENSG00000211746.3  | 0.81 |
| CD96     | ENSG00000153283.12 | 0.8  |
| CD3G     | ENSG00000160654.9  | 0.8  |
| SIRPG    | ENSG00000089012.14 | 0.79 |
| SLA2     | ENSG00000101082.13 | 0.79 |
| PYHIN1   | ENSG00000163564.14 | 0.79 |
| KLRB1    | ENSG00000111796.3  | 0.78 |

**Table S2. Full name of the cancer abbreviation in Figure 1.**

| Cohort        | Name of disease                                                  | Cohort    | Name of disease                    |
|---------------|------------------------------------------------------------------|-----------|------------------------------------|
| TCGA-ACC      | Adrenocortical carcinoma                                         | TCGA-LUAD | Lung adenocarcinoma                |
| TCGA-BLCA     | Bladder Urothelial Carcinoma                                     | TCGA-LUSC | Lung squamous cell carcinoma       |
| TCGA-BRCA     | Breast invasive carcinoma                                        | TCGA-MESO | Mesothelioma                       |
| TCGA-CESC     | Cervical squamous cell carcinoma and endocervical adenocarcinoma | TCGA-OV   | Ovarian serous cystadenocarcinoma  |
| TCGA-CHOL     | Cholangiocarcinoma                                               | TCGA-PAAD | Pancreatic adenocarcinoma          |
| TCGA-COAD     | Colon adenocarcinoma                                             | TCGA-PCPG | Pheochromocytoma and Paraganglioma |
| TCGA-COADREAD | Colon adenocarcinoma/Rectum adenocarcinoma Esophageal carcinoma  | TCGA-PRAD | Prostate adenocarcinoma            |
| TCGA-DLBC     | Lymphoid Neoplasm Diffuse Large B-cell Lymphoma                  | TCGA-READ | Rectum adenocarcinoma              |
| TCGA-ESCA     | Esophageal carcinoma                                             | TCGA-SARC | Sarcoma                            |
| TCGA-FPPP     | FFPE Pilot Phase II                                              | TCGA-STAD | Stomach adenocarcinoma             |
| TCGA-GBM      | Glioblastoma multiforme                                          | TCGA-SKCM | Skin Cutaneous                     |

|             |                                       |            |                                      |
|-------------|---------------------------------------|------------|--------------------------------------|
|             |                                       |            | Melanoma                             |
| TCGA-GBMLGG | Glioma                                | TCGA-STES  | Stomach and Esophageal carcinoma     |
| TCGA-HNSC   | Head and Neck squamous cell carcinoma | TCGA-TGCT  | Testicular Germ Cell Tumors          |
| TCGA-KICH   | Kidney Chromophobe                    | TCGA-THCA  | Thyroid carcinoma                    |
| TCGA-KIPAN  | Pan-kidney cohort (KICH+KIRC+KIRP)    | TCGA-THYM  | Thymoma                              |
| TCGA-KIRC   | Kidney renal clear cell carcinoma     | TCGA-UCEC  | Uterine Corpus Endometrial Carcinoma |
| TCGA-KIRP   | Kidney renal papillary cell carcinoma | TCGA-UCS   | Uterine Carcinosarcoma               |
| TCGA-LAML   | Acute Myeloid Leukemia                | TCGA-UVM   | Uveal Melanoma                       |
| TCGA-LGG    | Brain Lower Grade Glioma              | TARGET-OS  | Osteosarcoma                         |
| TCGA-LIHC   | Liver hepatocellular carcinoma        | TARGET-ALL | Acute Lymphoblastic Leukemia         |
| TARGET-NB   | Neuroblastoma                         | TARGET-WT  | High-Risk Wilms Tumor                |

**Table S3. Antibodies and Reagents.**

| Antibody/<br>Reagents         | Full name                                                   | Specificity       | Citation | Type                | Host       |
|-------------------------------|-------------------------------------------------------------|-------------------|----------|---------------------|------------|
| CXCR4                         | Anti-CXCR4 Antibody                                         | Mouse, Rat, Human | AF6621   | monoclonal antibody | Rabbit     |
| $\beta$ -tubulin              | Tubulin beta Antibody                                       | Mouse, Rat, Human | AF7011   | monoclonal antibody | Mouse      |
| Human TNF- $\alpha$ ELISA Kit | Human TNF- $\alpha$ (Tumor Necrosis Factor Alpha) ELISA Kit | Human             | EH0302   |                     | Human      |
| Immunostaining reagents       | GTVision TM III Detection System/ Mo&Rb(Including DAB)      | Mouse, Rat        | GK500705 |                     | Mouse, Rat |
| pLenti-CXCR4-sgRNA            |                                                             |                   | L23050   |                     |            |

|                          |         |
|--------------------------|---------|
| pLenti-Control-<br>sgRNA | L00011  |
| U87MG                    | YS190C1 |
| U251                     | ZQ0053  |

**Table S4. Statistics reporting.**

| Figure    | n | NAME                    | DATA<br>STRUCTURE      | TEST USED       | STATISTIC | P VALUE  |
|-----------|---|-------------------------|------------------------|-----------------|-----------|----------|
| <b>8D</b> | 6 | CXCR4 positive<br>ratio | Normal<br>distribution | Unpaired t-test | F=2.803   | P<0.0001 |
| <b>8F</b> | 6 | U87-TNF (pg/ml)         | Normal<br>distribution | Unpaired t-test | F =2.515  | P=0.0030 |
| <b>8F</b> | 6 | U251-TNF(pg/ml)         | Normal<br>distribution | Unpaired t-test | F =9.826  | P=0.0014 |
